# Supplementary material for: Revealing hidden supercooled liquid states in Al-based metallic glasses by ultrafast scanning calorimetry: Approaching theoretical ceiling of liquid fragility
Source: Springer Nature journal article supplement (doi:10.1007/s40843-019-9478-3), 2019-08-28
Supplement: 40843_2019_9478_MOESM1_ESM.pdf [file 40843_2019_9478_MOESM1_ESM.pdf]

## **Supplementary Materials for**

# **Revealing hidden supercooled liquid states in Al-based metallic glasses by ultrafast scanning calorimetry: Approaching theoretical ceiling of liquid fragility**

*Qun Yang<sup>1</sup>, Jing Huang<sup>2</sup>, Xiao-Hui Qin<sup>1</sup>, Fa-Xi Ge<sup>1</sup>, and Hai-Bin Yu<sup>1\*</sup>*

<sup>1</sup> Wuhan National High Magnetic Field Center and School of Physics, Huazhong University of Science and Technology, Wuhan 430074, China

<sup>2</sup> School of Materials and Engineering, Huazhong University of Science and Technology, Wuhan 430074, China

The Supplementary Materials provides details on the following five aspects of the work:

1. Verified accuracy of liquid fragility measured by FSC in three ways for Al-based MGs;
2. The heat flow curves of the twenty Al-based MGs by FSC at different heating rates, and determination of the liquid fragility for the twenty Al-based MGs;
3. Detailed data about glass forming ability;
4. Determination of the crystal melting temperature and the liquid temperature from DTA data;
5. The database of liquid fragility and glass transition temperature for different glass formers with different bonding nature.

1. Verification of the accuracy of the liquid fragility was performed by FSC.

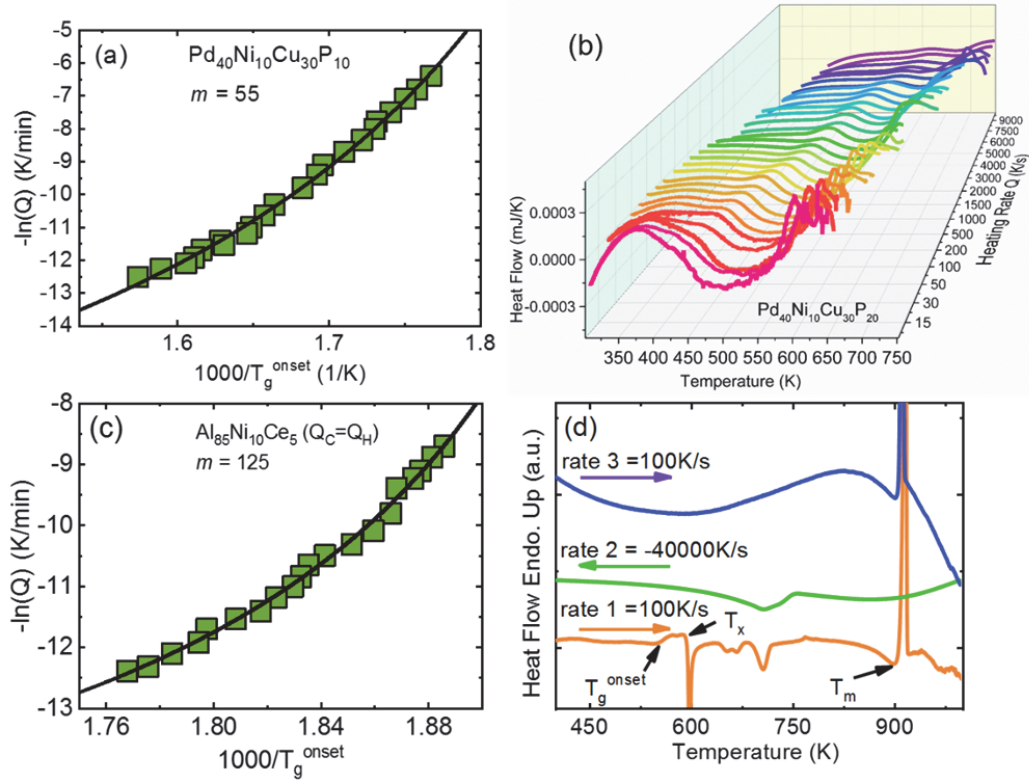

**Figure S1.** (a) The onset temperature of glass transition,  $T_g^{onset}$ , vs heating rates for a  $Pd_{40}Ni_{30}Cu_{10}P_{10}$  MG. The black solid line is a fit using the VFT equation. (b) Heat flow curves measured by FSC using different heating rates for a  $Pd_{40}Ni_{30}Cu_{10}P_{10}$  MG. (c) The glass transition kinetics is analyzed in terms of a VFT type equation for describing the heating rate dependence of the glass transition onset temperature for  $Al_{85}Ni_{10}Ce_5$  MG at various heating rates  $Q_H$  from 50 to 4000 K/s where  $Q_H=Q_C$ . (d) The glass forming ability of  $Al_{85}Ni_{10}Ce_5$  MG have been measured at different a series of three heating/cooling cycles on a MultiSTAR UFH 1 MEMS chip sensor. Here, for the first time, Flash DSC reaching heating rates of 100 K/s (rate 1) is utilized to investigate the thermal behavior of  $Al_{85}Ni_{10}Ce_5$  MG up to the liquid temperature. It is obvious that the

$\text{Al}_{85}\text{Ni}_{10}\text{Ce}_5$  MG clearly undergoes a transformation from an amorphous state to a crystalline state through an undercooled liquid region and a series of exothermic crystallization reaction, and the sample eventually melts into a liquid state. Here, we can obtain the heat capacity jump at  $T_g$  and the enthalpy of melting. Subsequently, the melted liquid was cooled down at a cooling rate of 40,000 K/s (rate 2), and it was found that the sample crystallized at about 750 K during the cooling. Subsequent heating of the cooled sample again at a heating rate of 100 K/s (rate 3) further demonstrates that  $\text{Al}_{85}\text{Ni}_{10}\text{Ce}_5$  MG has a higher critical cooling rate than 40,000 K/s.

2. The heat flow curves of the twenty Al-based MGs by FSC at different heating rates, and determination of the liquid fragility for the twenty Al-based MGs.

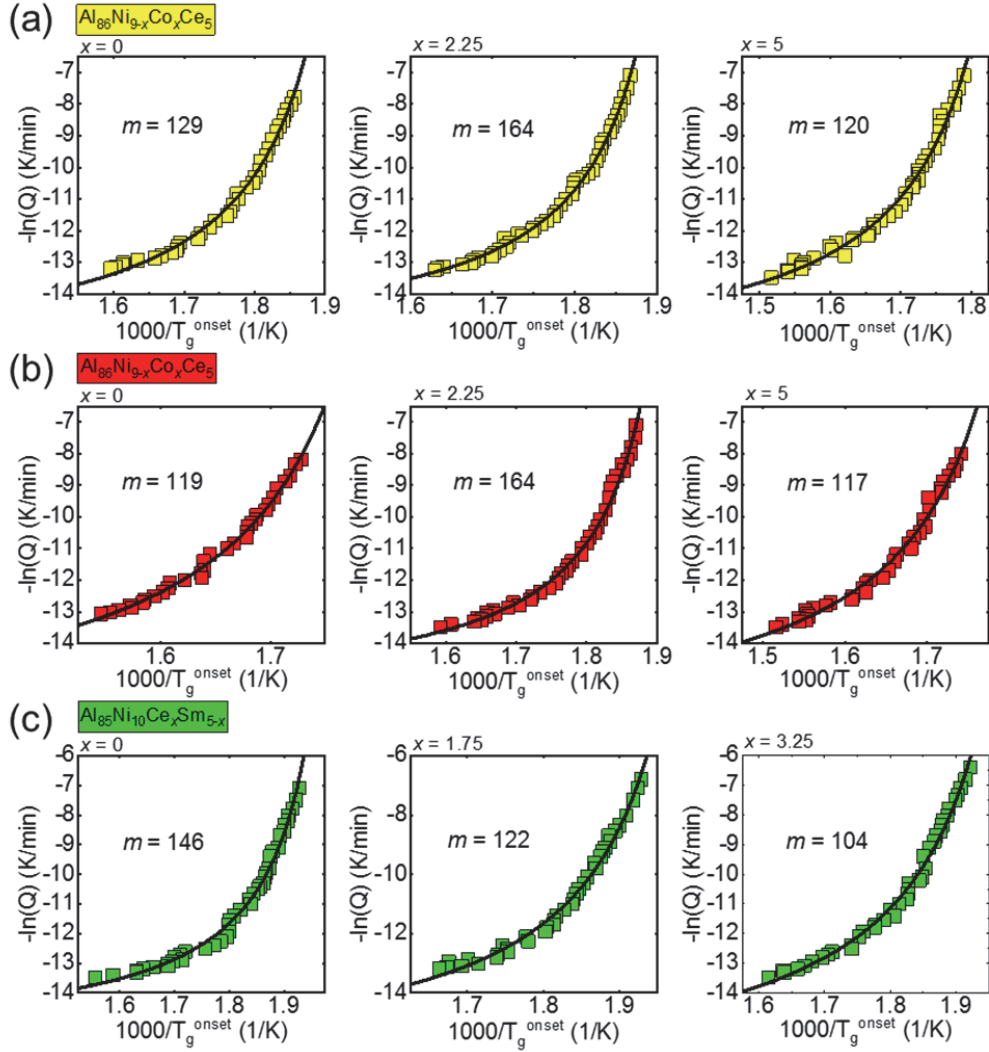

**Figure S2.** The onset temperature of glass transition,  $T_g^{\text{onset}}$ , vs heating rates for different Al-based MGs (a)  $\text{Al}_{86}\text{Ni}_{9-x}\text{Co}_x\text{Ce}_5$  ( $x=0, 2.25, 5$  at. %); (b)  $\text{Al}_{86}\text{Ni}_{9-x}\text{Co}_x\text{La}_5$  ( $x=0, 2.25, 5$  at. %); (c)  $\text{Al}_{85}\text{Ni}_{10}\text{Ce}_x\text{Sm}_{5-x}$  ( $x=0, 1.75, 3.25$  at. %). The black solid line is a fit using the VFT equation.

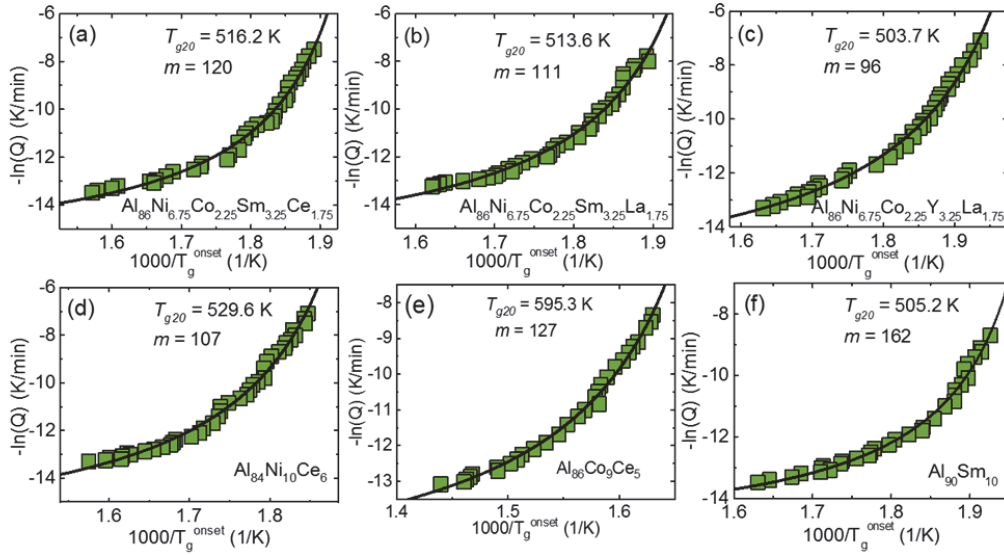

**Figure S3.** The onset temperature of glass transition,  $T_g^{onset}$ , vs heating rates for different Al-based MGs **(a)**  $\text{Al}_{86}\text{Ni}_{6.75}\text{Co}_{2.25}\text{Sm}_{3.25}\text{Ce}_{1.75}$ ; **(b)**  $\text{Al}_{86}\text{Ni}_{6.75}\text{Co}_{2.25}\text{Sm}_{3.25}\text{La}_{1.75}$ ; **(c)**  $\text{Al}_{86}\text{Ni}_{6.75}\text{Co}_{2.25}\text{Y}_{3.25}\text{La}_{1.75}$ ; **(d)**  $\text{Al}_{84}\text{Ni}_{10}\text{Ce}_6$ ; **(e)**  $\text{Al}_{86}\text{Co}_9\text{Ce}_5$ ; **(f)**  $\text{Al}_{90}\text{Sm}_{10}$ . The black solid line is a fit using the VFT equation. The  $T_{g20}$  is extrapolated from the FSC data.

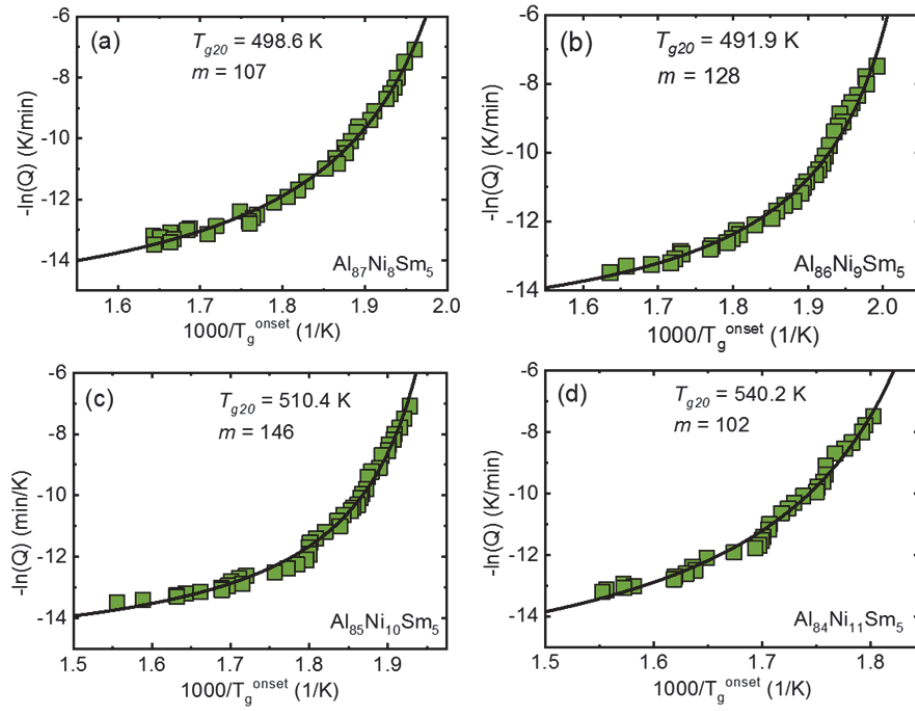

**Figure S4.** The onset temperature of glass transition,  $T_g^{onset}$ , vs heating rates for the Al<sub>95-x</sub>Ni<sub>x</sub>Sm<sub>5</sub> (x=8 (a), 9 (b), 10 (c), 11 (d) at.%) MGs. The black solid line is a fit using the VFT equation. The  $T_{g20}$  is extrapolated from the FSC data.

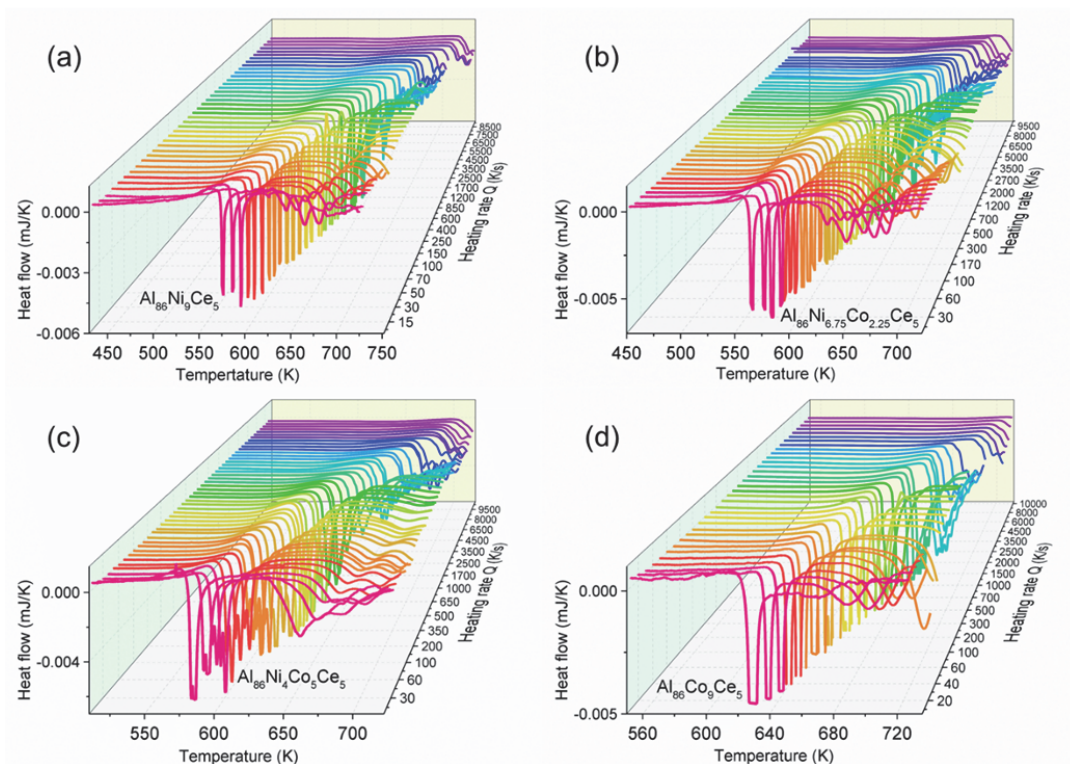

**Figure S5.** Heat flow curves are measured by FSC using different heating rates from 10-10000 K/s for  $\text{Al}_{86}\text{Ni}_{9-x}\text{Co}_x\text{Ce}_5$  ( $x=0$  (a), 2.25 (b), 5 (c), 9 (d) at.% ) MGs. The heat flow curves for different heating rates are normalized by dividing by the heating rate.



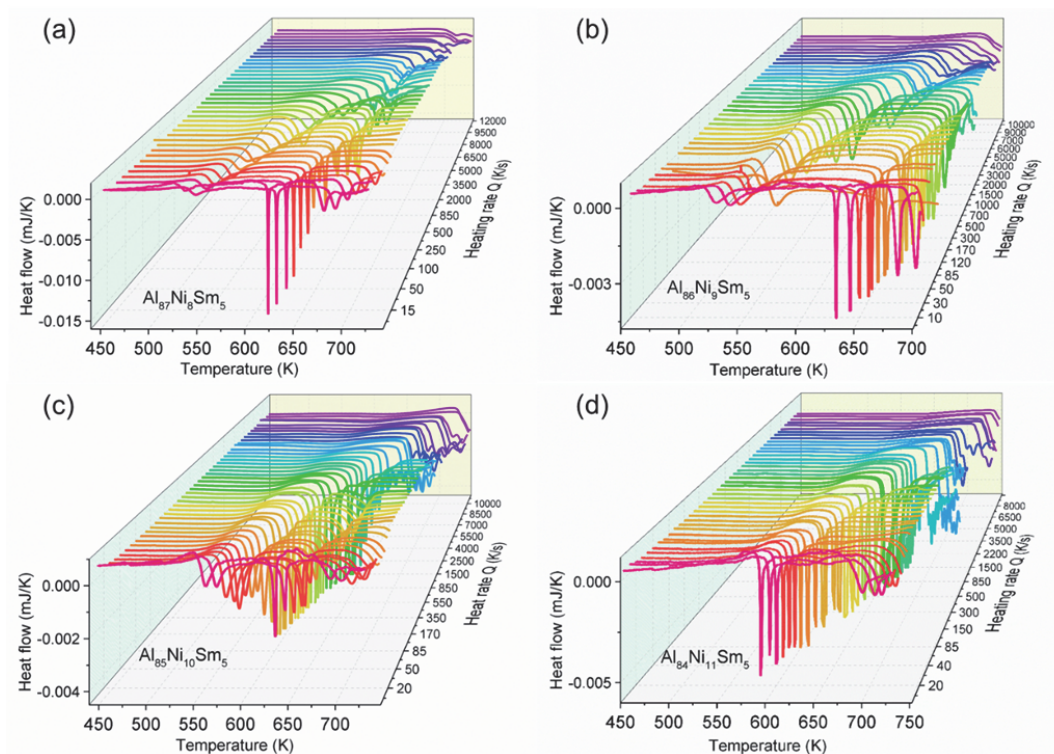

**Figure S6.** Heat flow curves are measured by FSC using different heating rates from 10-12000 K/s for  $\text{Al}_{95-x}\text{Ni}_x\text{Sm}_5$  ( $x=8$  (a), 9 (b), 10 (c), 11 (d) at.% ) MGs.

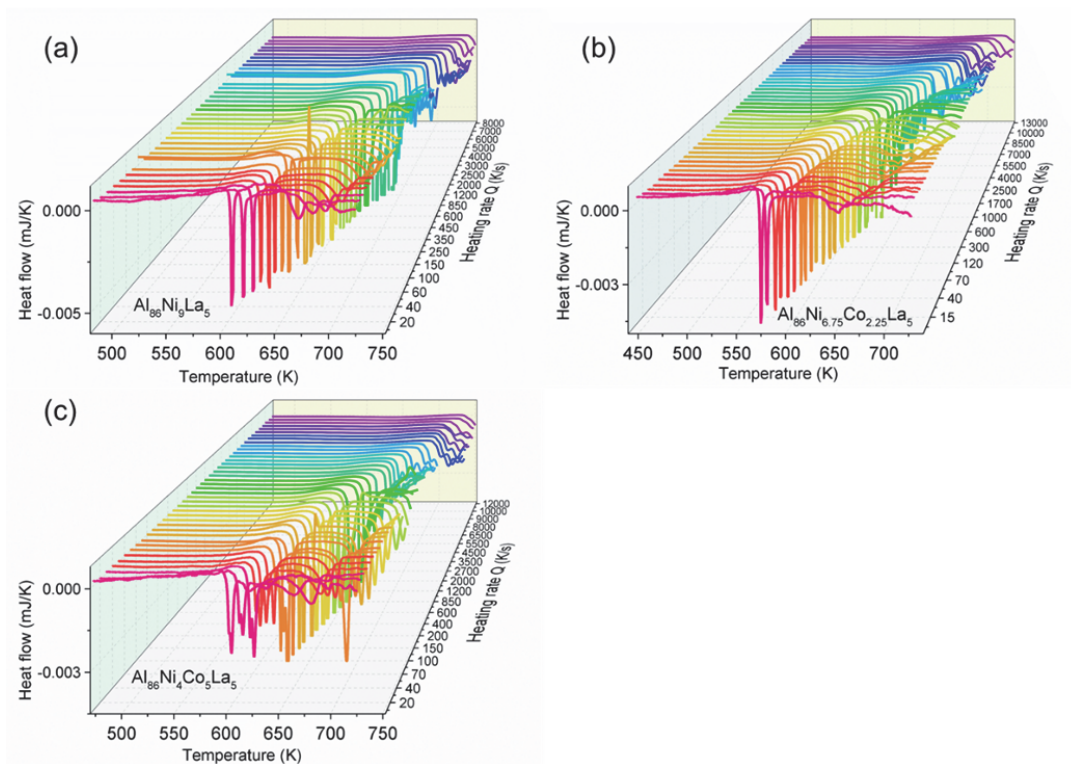

**Figure S7.** Heat flow curves are measured by FSC using different heating rates from 10-13000 K/s for  $\text{Al}_{86}\text{Ni}_{9-x}\text{Co}_x\text{La}_5$  ( $x=0$  (a), 2.25 (b), 5 (c) at.% ) MGs.

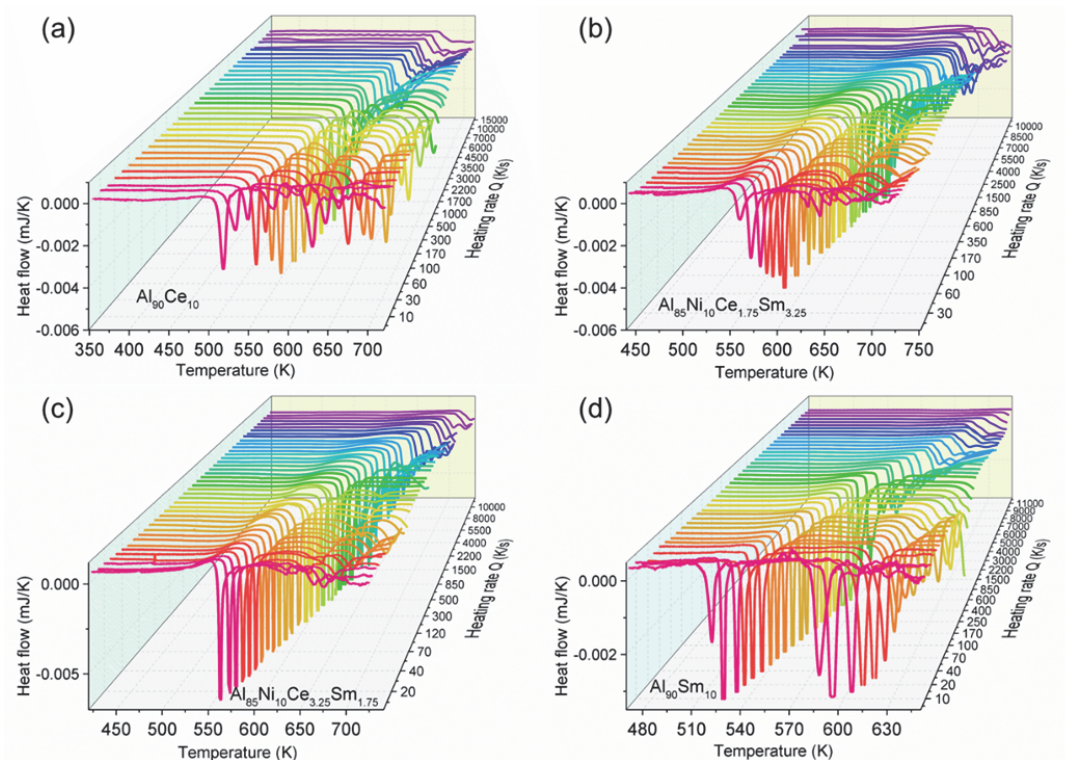

**Figure S8.** Heat flow curves are measured by FSC using different heating rates from 10-10000 K/s for different Al-based MGs **(a)**  $\text{Al}_{90}\text{Ce}_{10}$ ; **(b)**  $\text{Al}_{85}\text{Ni}_{10}\text{Ce}_{1.75}\text{Sm}_{3.25}$ ; **(c)**  $\text{Al}_{85}\text{Ni}_{10}\text{Ce}_{3.25}\text{Sm}_{1.75}$ ; **(d)**  $\text{Al}_{90}\text{Sm}_{10}$ .

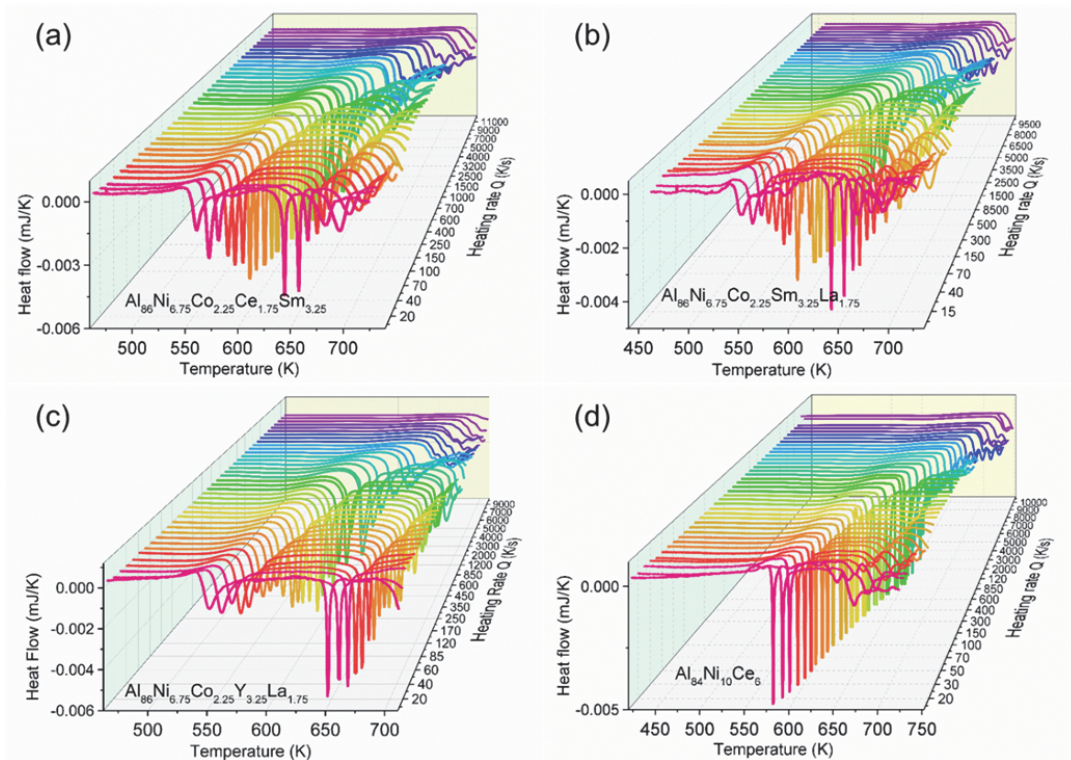

**Figure S9.** Heat flow curves are measured by FSC using different heating rates from 10-10000 K/s for different Al-based MGs **(a)**  $\text{Al}_{86}\text{Ni}_{6.75}\text{Co}_{2.25}\text{Ce}_{1.75}\text{Sm}_{3.25}$ ; **(b)**  $\text{Al}_{86}\text{Ni}_{6.75}\text{Co}_{2.25}\text{Sm}_{3.25}\text{La}_{1.75}$ ; **(c)**  $\text{Al}_{86}\text{Ni}_{6.75}\text{Co}_{2.25}\text{Y}_{3.25}\text{La}_{1.75}$ ; **(d)**  $\text{Al}_{84}\text{Ni}_{10}\text{Ce}_6$ .

3. Detailed data on the glass forming ability (GFA) studied in this work for 20 typical Al-MGs with different compositions. Amorphous ribbons of different thicknesses was obtained by varying the rotational speed of the rollers at speeds between 10 m/s and 60 m/s. Subsequently, the amorphous nature of different thicknesses ribbons were investigated by X-ray diffraction (XRD, Bruke D2 Phaser) with monochromatic Cu K  $\alpha$  radiation ( $\lambda = 0.1542$  nm).

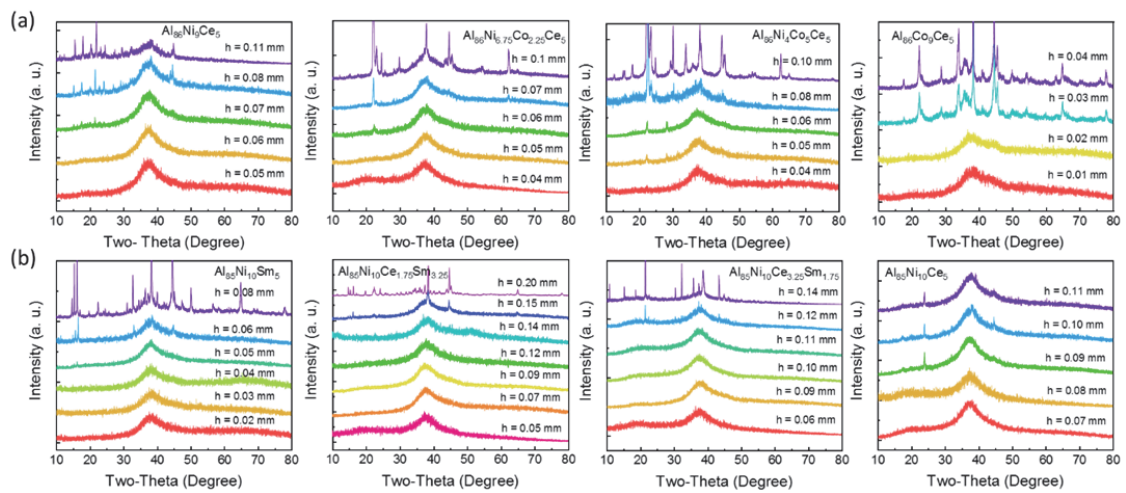

**Figure S10.** XRD patterns of ribbons with different thicknesses for different Al-based MGs (a)  $\text{Al}_{86}\text{Ni}_{9-x}\text{Co}_x\text{Ce}_5$  ( $x=0, 2.25, 5, 9$  at. % ); (b)  $\text{Al}_{85}\text{Ni}_{10}\text{Sm}_{5-x}$  ( $x=0, 1.75, 3.25, 5$  at. %).

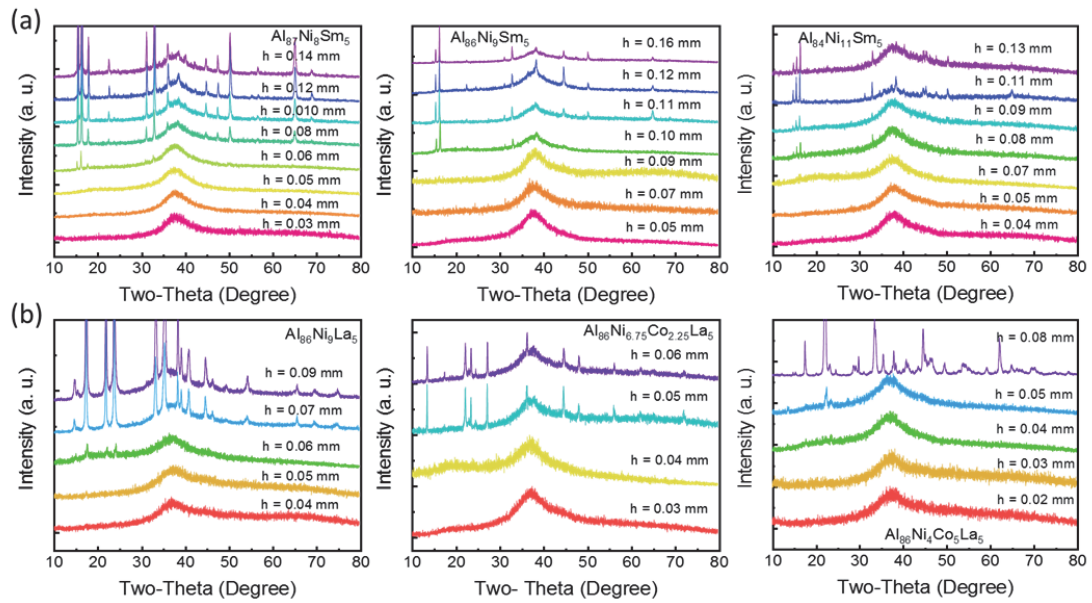

**Figure S11.** XRD patterns of ribbons with different thicknesses for different Al-based MGs (a)  $\text{Al}_{95-x}\text{Ni}_x\text{Sm}_5$  ( $x=8, 9, 11$  at.% ); (b)  $\text{Al}_{86}\text{Ni}_{9-x}\text{Co}_x\text{La}_5$  ( $x=0, 2.25, 5$  at.%).

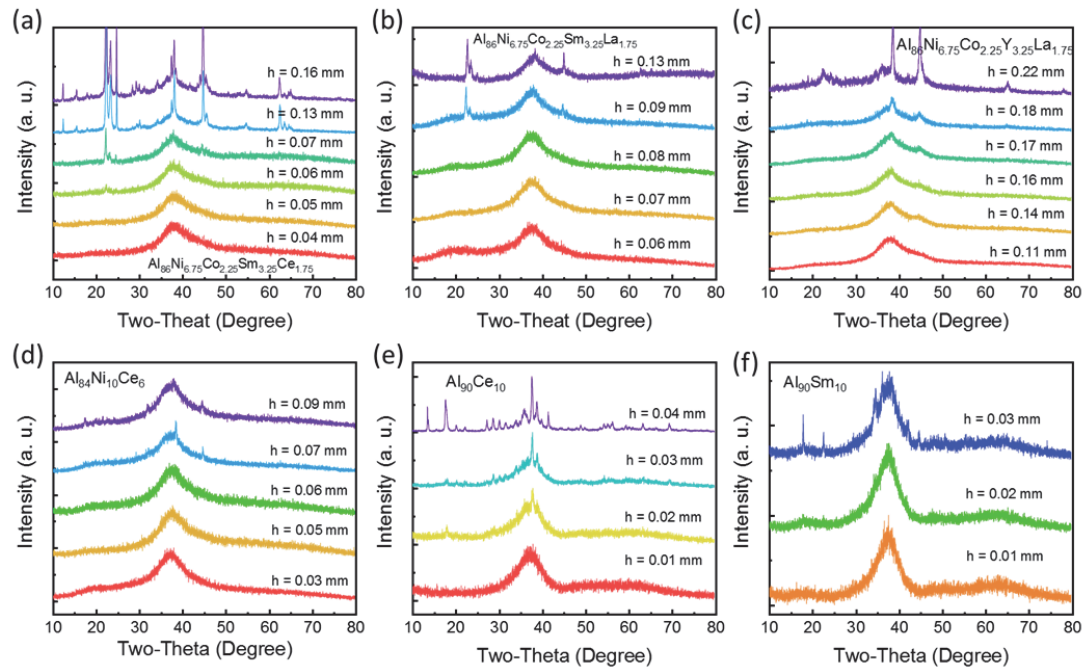

**Figure S12.** XRD patterns of ribbons with different thicknesses for different Al-based MGs (a)  $\text{Al}_{86}\text{Ni}_{6.75}\text{Co}_{2.25}\text{Sm}_{3.25}\text{Ce}_{1.75}$ ; (b)  $\text{Al}_{86}\text{Ni}_{6.75}\text{Co}_{2.25}\text{Sm}_{3.25}\text{La}_{1.75}$ ; (c)

$\text{Al}_{86}\text{Ni}_{6.75}\text{Co}_{2.25}\text{Y}_{3.25}\text{La}_{1.75}$ ; **(d)**  $\text{Al}_{84}\text{Ni}_{10}\text{Ce}_6$ ; **(e)**  $\text{Al}_{90}\text{Ce}_{10}$ ; **(f)**  $\text{Al}_{90}\text{Sm}_{10}$ .

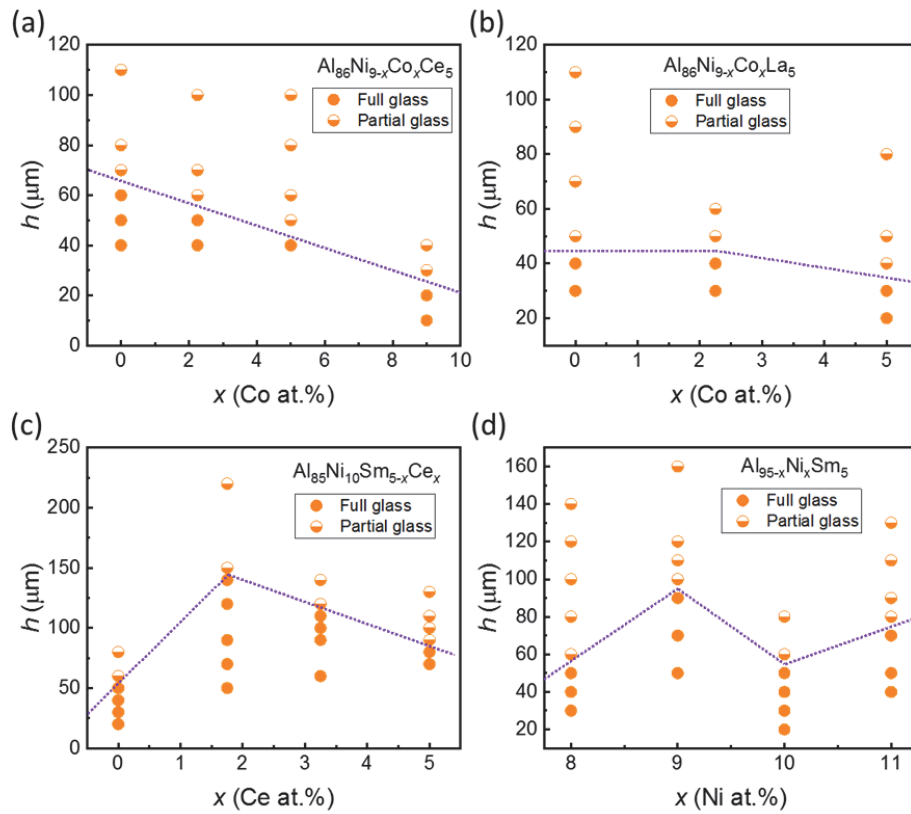

**Figure S13.** Illustration of glass formation range in different Al-based MGs system. **(a)**

$\text{Al}_{86}\text{Ni}_{9-x}\text{Co}_x\text{Ce}_5$  ( $x=0, 2.25, 5, 9$  at.%); **(b)**  $\text{Al}_{86}\text{Ni}_{9-x}\text{Co}_x\text{La}_5$  ( $x=0, 2.25, 5$  at.); **(c)**

$\text{Al}_{85}\text{Ni}_{10}\text{Ce}_x\text{Sm}_{5-x}$  ( $x=0, 1.75, 3.25, 5$  at.%); **(d)**  $\text{Al}_{95-x}\text{Ni}_x\text{Sm}_5$  ( $x=8, 9, 10, 11$  at.%).



4. Determination of the crystal melting temperature  $T_m$  and the liquid temperature  $T_L$  from DTA data.

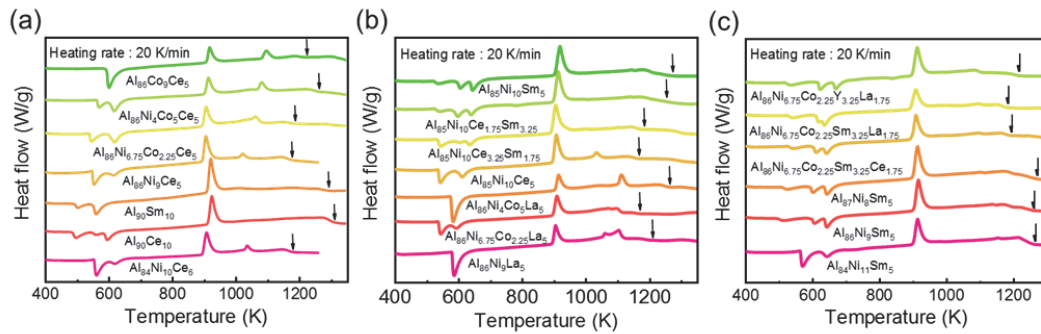

**Figure S14.** The heat flow curves measured by DTA (TA SDT Q600) with a heating rate of 20 K/min under a 100 ml/min argon gas flow for different Al-based MGs. The temperature marked by the black arrow is the liquid temperature  $T_L$ .

**5. The database of liquid fragility and glass transition temperature for different glass formers with different bonding nature.**

| <b>ID</b> | <b>Composition</b>                                  | <b><math>T_g</math> (K)</b> | <b><math>m</math></b> | <b>References</b> |
|-----------|-----------------------------------------------------|-----------------------------|-----------------------|-------------------|
| 1         | 3-bromopentane                                      | 108                         | 69                    | [1]               |
| 2         | 3-styrene                                           | 237                         | 72                    | [1]               |
| 3         | 5-polyphenylether                                   | 248                         | 85                    | [1]               |
| 4         | 2-phenyl-5-acetomethyl-5-ethyl-1,3-dioxocyclohexane | 219                         | 72                    | [1]               |
| 5         | benzophenone                                        | 208                         | 125                   | [1]               |
| 6         | butyronitrile                                       | 97                          | 56                    | [1]               |
| 7         | biphenyl-2yl-isobutylate                            | 209                         | 77                    | [1]               |
| 8         | 3,3,4,4,-benzophenone-tetra-carboxylic dianhydride  | 333                         | 80                    | [1]               |
| 9         | isopropylbenzene-1                                  | 129                         | 70                    | [1]               |
| 10        | isopropylbenzene-2                                  | 129                         | 73                    | [1]               |
| 11        | dibutylammonium formate                             | 155                         | 57                    | [1]               |
| 12        | dibutylphthalate                                    | 179                         | 75                    | [1]               |
| 13        | di-n-butylphthalate                                 | 168                         | 69                    | [1]               |
| 14        | tetraphenyl?tetramethyl trisiloxane                 | 213                         | 95                    | [1]               |
| 15        | dichyclohexyl-methyl-2-methylsuccinate              | 221                         | 76                    | [1]               |
| 16        | diethylphthalate                                    | 185                         | 70                    | [1]               |
| 17        | decahydroisoquinoline                               | 180                         | 129                   | [1]               |
| 18        | di-iso-butylphthalate                               | 194                         | 78                    | [1]               |
| 19        | dimethylphthalate                                   | 195                         | 70                    | [1]               |
| 20        | dioctylphthalate                                    | 187                         | 60                    | [1]               |
| 21        | dipropylene glycol                                  | 196                         | 66                    | [1]               |
| 22        | dipropylglycol?dimethylether                        | 136                         | 78                    | [1]               |
| 23        | ether-2-ethylhexylamine                             | 140                         | 71                    | [1]               |
| 24        | ethanol                                             | 92.5                        | 55                    | [1]               |
| 25        | diglycidylether of bisphenol A (epoxy resin)        | 225                         | 96                    | [1]               |
| 26        | 3-fluoroaniline                                     | 173                         | 95                    | [1]               |
| 27        | glycerol                                            | 191                         | 53                    | [1]               |
| 28        | cresolphthalein?dimethylether                       | 318                         | 73                    | [1]               |
| 29        | m-tricresylphosphate                                | 208                         | 76                    | [1]               |
| 30        | 2-methyltetrahydrofuran-1                           | 92                          | 65                    | [1]               |
| 31        | 2-methyltetrahydrofuran-2                           | 91                          | 84                    | [1]               |
| 32        | m-toluidine                                         | 185                         | 77                    | [1]               |
| 33        | n-propanol-1                                        | 99                          | 40                    | [1]               |
| 34        | n-propanol-2                                        | 99                          | 35                    | [1]               |
| 35        | o-terphenyl                                         | 243                         | 81                    | [1]               |

|    |                                         |       |     |     |
|----|-----------------------------------------|-------|-----|-----|
| 36 | phenolphthalein dimethylether           | 294   | 85  | [1] |
| 37 | 1,2-propandiol (propylene glycol)       | 164   | 52  | [1] |
| 38 | perhydroisoquinoline                    | 181   | 130 | [1] |
| 39 | polypropylene glycol                    | 199   | 75  | [1] |
| 40 | pyridine?toluene                        | 126   | 109 | [1] |
| 41 | salol                                   | 221   | 73  | [1] |
| 42 | sucrose benzonate                       | 340   | 94  | [1] |
| 43 | squalane                                | 170   | 75  | [1] |
| 44 | sorbitol                                | 368   | 93  | [1] |
| 45 | tri- $\alpha$ -naphthylbenzene-1        | 335   | 76  | [1] |
| 46 | tri- $\alpha$ -naphthylbenzene-2        | 335   | 66  | [1] |
| 47 | tricresylphosphate                      | 209   | 76  | [1] |
| 48 | trisnaphthylbenzene                     | 342   | 86  | [1] |
| 49 | toluene                                 | 166   | 105 | [1] |
| 50 | tripropylene glycol                     | 192   | 72  | [1] |
| 51 | triphenyl phosphite                     | 204   | 69  | [1] |
| 52 | xylitol                                 | 250   | 87  | [1] |
| 53 | ethyl benzene                           | 115   | 98  | [1] |
| 54 | toluene                                 | 117   | 105 | [1] |
| 55 | Iso-propyl benzene                      | 128   | 70  | [1] |
| 56 | $\alpha$ -Picoline                      | 129   | 72  | [1] |
| 57 | propylene carbonate                     | 157   | 99  | [1] |
| 58 | 4-tert-Butyl pyridine (4-TBP)           | 164   | 103 | [1] |
| 59 | Propylene glycol                        | 168   | 52  | [1] |
| 60 | glycerol                                | 188   | 53  | [1] |
| 61 | dimethyl phthalate                      | 191   | 70  | [1] |
| 62 | monoepoxide phenyl glycidyl ether (PGE) | 194   | 81  | [1] |
| 63 | m-Tricresyl phosphate (m-TCP)           | 205   | 76  | [1] |
| 64 | biphenyl                                | 245   | 96  | [1] |
| 65 | poly(vinyl acetate)                     | 303   | 95  | [1] |
| 66 | 2-Methyl pentane                        | 77    | 36  | [2] |
| 67 | 3-Bromopentane                          | 108   | 53  | [2] |
| 68 | 2-Methyltetrahydrofuran                 | 91    | 65  | [2] |
| 69 | dibutyl phthalate                       | 179   | 69  | [2] |
| 70 | tris-naphthylbenzene                    | 344.8 | 86  | [2] |
| 71 | deuterated tris-naphthylbenzene         | 342.9 | 83  | [2] |
| 72 | squalane                                | 167.4 | 75  | [2] |
| 73 | chiral isoocylcyanobiphenyl             | 221   | 87  | [2] |
| 74 | phenolphthalein dimethylether           | 294   | 75  | [2] |
| 75 | 1,1'-Bis(p-methyloxyphenyl) cyclohexane | 241   | 72  | [2] |
| 76 | triphenylchloromethane                  | 243   | 93  | [2] |

|     |                                               |       |     |     |
|-----|-----------------------------------------------|-------|-----|-----|
| 77  | di-2-ethylhexylphthalate                      | 187   | 67  | [2] |
| 78  | m-Xylene                                      | 120   | 56  | [2] |
| 79  | o-Xylene                                      | 123   | 55  | [2] |
| 80  | a-phenyl-o-cresol                             | 220   | 83  | [2] |
| 81  | m-Fluorotoluene                               | 117   | 45  | [2] |
| 82  | 5-Phenyl-4-ether                              | 243   | 85  | [2] |
| 83  | aroclor A 1248                                | 229   | 85  | [2] |
| 84  | bis-phenol-C-dimethylether                    | 240   | 96  | [2] |
| 85  | sucrose benzoate                              | 337   | 94  | [2] |
| 86  | cresolphthalein-dimethylether                 | 314   | 68  | [2] |
| 87  | decahydro-naphthalene                         | 135   | 147 | [2] |
| 88  | tri-2-naphthylbenzene                         | 337   | 66  | [2] |
| 89  | 1,10-Di(4-methoxy-5-methylphenyl) cyclohexane | 261   | 66  | [2] |
| 90  | n-ethylacetamide                              | 158.2 | 65  | [2] |
| 91  | glycerol                                      | 186   | 48  | [3] |
| 92  | m-toluidine                                   | 187   | 77  | [3] |
| 93  | propanol                                      | 98    | 40  | [3] |
| 94  | methanol                                      | 100   | 39  | [4] |
| 95  | n-propanol                                    | 96.2  | 40  | [4] |
| 96  | butyronitrile                                 | 97    | 56  | [4] |
| 97  | ethylene glycol                               | 151   | 50  | [4] |
| 98  | m-cresol                                      | 198.6 | 57  | [4] |
| 99  | b-D-fructose                                  | 286   | 61  | [4] |
| 100 | phenolphthalein                               | 363   | 62  | [4] |
| 101 | Indomethacin                                  | 318   | 75  | [4] |
| 102 | hydrochloro-thiazide                          | 385   | 65  | [4] |
| 103 | griseofulvin                                  | 364   | 65  | [4] |
| 104 | 1,3,5-tri--naphthylbenzene                    | 340   | 76  | [4] |
| 105 | diethylphthalate                              | 178   | 73  | [4] |
| 106 | probucol                                      | 295   | 67  | [4] |
| 107 | 9-bromophenanthrene                           | 224.8 | 69  | [4] |
| 108 | phenobarbital                                 | 319   | 70  | [4] |
| 109 | d-glucose                                     | 309   | 72  | [4] |
| 110 | maltitol                                      | 311   | 75  | [4] |
| 111 | glibenclamide                                 | 331   | 75  | [4] |
| 112 | flopropione                                   | 335   | 81  | [4] |
| 113 | phenyl-cresol                                 | 220   | 61  | [4] |
| 114 | sucrose                                       | 345   | 98  | [4] |
| 115 | BSC                                           | 825   | 32  | [1] |
| 116 | CN60.0                                        | 1030  | 27  | [1] |
| 117 | CN60.2                                        | 820   | 22  | [1] |

|     |                                                                                                                  |      |    |     |
|-----|------------------------------------------------------------------------------------------------------------------|------|----|-----|
| 118 | CN60.4                                                                                                           | 700  | 19 | [1] |
| 119 | NBS                                                                                                              | 705  | 32 | [1] |
| 120 | NBS 710                                                                                                          | 830  | 35 | [1] |
| 121 | NS 66                                                                                                            | 726  | 38 | [1] |
| 122 | NS 80                                                                                                            | 758  | 37 | [1] |
| 123 | PS1                                                                                                              | 738  | 19 | [1] |
| 124 | PS2                                                                                                              | 746  | 18 | [1] |
| 125 | PS3                                                                                                              | 765  | 20 | [1] |
| 126 | Soda lime                                                                                                        | 536  | 40 | [2] |
| 127 | NS75.6                                                                                                           | 764  | 30 | [2] |
| 128 | NS75                                                                                                             | 739  | 37 | [2] |
| 129 | NS67                                                                                                             | 729  | 45 | [2] |
| 130 | $\text{CaAl}_2\text{Si}_2\text{O}_8$                                                                             | 1118 | 53 | [2] |
| 131 | Silicate flint glass                                                                                             | 538  | 57 | [2] |
| 132 | $\text{Na}_2\text{O}\cdot 2\text{SiO}_2$                                                                         | 713  | 38 | [2] |
| 133 | $70\text{SiO}_2\cdot 11\text{B}_2\text{O}_3\cdot 9\text{Na}_2\text{O}\cdot 7\text{K}_2\text{O}\cdot 3\text{BaO}$ | 860  | 32 | [2] |
| 134 | $0.756\text{SiO}_2\cdot 0.244\text{K}_2\text{O}$                                                                 | 778  | 29 | [2] |
| 135 | $0.756\text{SiO}_2\cdot 0.122\text{Na}_2\text{O}\cdot 0.122\text{K}_2\text{O}$                                   | 729  | 29 | [2] |
| 136 | $\text{SiO}_2$                                                                                                   | 1500 | 20 | [2] |
| 137 | Silica (infrasil)                                                                                                | 1449 | 28 | [2] |
| 138 | Borosilicate glass                                                                                               | 795  | 26 | [2] |
| 139 | Borosilicate BB                                                                                                  | 851  | 43 | [2] |
| 140 | Borosilicate pyrex                                                                                               | 871  | 31 | [2] |
| 141 | Borosilicate E                                                                                                   | 996  | 33 | [2] |
| 142 | Borosilicate BNC                                                                                                 | 850  | 37 | [2] |
| 143 | Borosilicate NC                                                                                                  | 850  | 34 | [2] |
| 144 | Soda lime silica                                                                                                 | 811  | 35 | [2] |
| 145 | $\text{GeO}_2$                                                                                                   | 818  | 20 | [2] |
| 146 | $\text{NaAlSi}_2\text{O}_6$                                                                                      | 1053 | 29 | [2] |
| 147 | $\text{B}_2\text{O}_3$                                                                                           | 554  | 32 | [2] |
| 148 | $\text{CaO}\cdot \text{MgO}\cdot 2\text{SiO}_2$                                                                  | 995  | 66 | [5] |
| 149 | $\text{Na}_2\text{O}\cdot 2\text{SiO}_2$                                                                         | 708  | 29 | [5] |
| 150 | $\text{Li}_2\text{O}\cdot 2\text{SiO}_2$                                                                         | 710  | 33 | [5] |
| 151 | $\text{Na}_2\text{O}_2\cdot \text{SiO}_2$                                                                        | 728  | 36 | [6] |
| 152 | $\text{Li}_2\text{O}\cdot 2\text{SiO}_2$                                                                         | 727  | 35 | [6] |
| 153 | $\text{Li}_2\text{O}\cdot 2\text{B}_2\text{O}_3$                                                                 | 749  | 88 | [6] |
| 154 | $\text{GeO}_2$                                                                                                   | 830  | 18 | [6] |
| 155 | NIST 710a                                                                                                        | 831  | 45 | [6] |
| 156 | E-glass                                                                                                          | 962  | 51 | [6] |
| 157 | Basalt                                                                                                           | 943  | 63 | [6] |
| 158 | $45\text{CaO}\cdot 55\text{SiO}_2$                                                                               | 1025 | 90 | [6] |

|     |                                                                                                   |      |     |     |
|-----|---------------------------------------------------------------------------------------------------|------|-----|-----|
| 159 | 55CaO·45SiO <sub>2</sub>                                                                          | 1056 | 141 | [6] |
| 160 | Fe <sub>83</sub> B <sub>17</sub>                                                                  | 760  | 103 | [7] |
| 161 | Au <sub>77.8</sub> Ge <sub>13.8</sub> Si <sub>8.4</sub>                                           | 294  | 92  | [7] |
| 162 | Fe <sub>41.5</sub> Ni <sub>41.5</sub> B <sub>17</sub>                                             | 720  | 99  | [7] |
| 163 | Co <sub>75</sub> Si <sub>15</sub> B <sub>10</sub>                                                 | 785  | 118 | [7] |
| 164 | Fe <sub>79</sub> Si <sub>10</sub> B <sub>11</sub>                                                 | 818  | 117 | [7] |
| 165 | Ni <sub>75</sub> Si <sub>8</sub> B <sub>17</sub>                                                  | 818  | 121 | [7] |
| 166 | Fe <sub>80</sub> P <sub>13</sub> B <sub>7</sub>                                                   | 736  | 102 | [7] |
| 167 | Pt <sub>60</sub> Ni <sub>15</sub> P <sub>25</sub>                                                 | 500  | 86  | [7] |
| 168 | Pd <sub>82</sub> Si <sub>18</sub>                                                                 | 657  | 106 | [7] |
| 169 | Pd <sub>79.5</sub> Cu <sub>4</sub> Si <sub>16.5</sub>                                             | 635  | 77  | [7] |
| 170 | Ce <sub>70</sub> Ni <sub>10</sub> Cu <sub>10</sub> Al <sub>10</sub>                               | 359  | 37  | [7] |
| 171 | Au <sub>49</sub> Ag <sub>5.5</sub> Pd <sub>2.3</sub> Cu <sub>26.9</sub> Si <sub>16.3</sub>        | 401  | 70  | [7] |
| 172 | Fe <sub>48</sub> Cr <sub>15</sub> Mo <sub>14</sub> C <sub>15</sub> B <sub>6</sub> Y <sub>2</sub>  | 822  | 51  | [7] |
| 173 | Pd <sub>77</sub> Cu <sub>6</sub> Si <sub>17</sub>                                                 | 642  | 52  | [7] |
| 174 | La <sub>55</sub> Cu <sub>20</sub> Al <sub>25</sub>                                                | 456  | 43  | [7] |
| 175 | Pd <sub>77.5</sub> Cu <sub>6</sub> Si <sub>16.5</sub>                                             | 637  | 73  | [7] |
| 176 | La <sub>55</sub> Ni <sub>20</sub> Al <sub>25</sub>                                                | 491  | 35  | [7] |
| 177 | Mg <sub>65</sub> Cu <sub>25</sub> Y <sub>10</sub>                                                 | 413  | 46  | [7] |
| 178 | Zr <sub>42</sub> Cu <sub>46</sub> Al <sub>7</sub> Y <sub>5</sub>                                  | 672  | 49  | [7] |
| 179 | La <sub>55</sub> Ni <sub>5</sub> Cu <sub>15</sub> Al <sub>25</sub>                                | 459  | 42  | [7] |
| 180 | La <sub>55</sub> Ni <sub>15</sub> Cu <sub>5</sub> Al <sub>25</sub>                                | 474  | 37  | [7] |
| 181 | Zr <sub>46.25</sub> Ti <sub>8.25</sub> Cu <sub>7.5</sub> Ni <sub>10</sub> Be <sub>27.5</sub>      | 622  | 36  | [7] |
| 182 | Fe <sub>48</sub> Cr <sub>15</sub> Mo <sub>14</sub> Er <sub>2</sub> C <sub>15</sub> B <sub>6</sub> | 844  | 38  | [7] |
| 183 | La <sub>55</sub> Al <sub>25</sub> Ni <sub>10</sub> Cu <sub>10</sub>                               | 467  | 35  | [7] |
| 184 | Zr <sub>55</sub> Co <sub>25</sub> Al <sub>20</sub>                                                | 753  | 65  | [7] |
| 185 | Zr <sub>44</sub> Ti <sub>11</sub> Cu <sub>10</sub> Ni <sub>10</sub> Be <sub>25</sub>              | 625  | 41  | [7] |
| 186 | Zr <sub>52.5</sub> Cu <sub>17.9</sub> Ni <sub>14.6</sub> Al <sub>10</sub> Ti <sub>5</sub>         | 674  | 51  | [7] |
| 187 | Zr <sub>57</sub> Cu <sub>15.4</sub> Ni <sub>12.6</sub> Al <sub>10</sub> Nb <sub>5</sub>           | 682  | 71  | [7] |
| 188 | Pd <sub>48</sub> Ni <sub>32</sub> P <sub>20</sub>                                                 | 590  | 43  | [7] |
| 189 | Zr <sub>46.75</sub> Ti <sub>8.25</sub> Cu <sub>7.5</sub> Ni <sub>10</sub> Be <sub>27.5</sub>      | 590  | 46  | [7] |
| 190 | Zr <sub>45</sub> Cu <sub>46</sub> Al <sub>7</sub> Y <sub>2</sub>                                  | 693  | 72  | [7] |
| 191 | Zr <sub>58.5</sub> Cu <sub>15.6</sub> Ni <sub>12.8</sub> Al <sub>10.3</sub> Nb <sub>2.8</sub>     | 660  | 46  | [7] |
| 192 | Zr <sub>65</sub> Cu <sub>17.5</sub> Ni <sub>10</sub> Al <sub>7.5</sub>                            | 656  | 35  | [7] |
| 193 | Zr <sub>41.2</sub> Ti <sub>13.8</sub> Cu <sub>12.5</sub> Ni <sub>10</sub> Be <sub>22.5</sub>      | 623  | 50  | [7] |
| 194 | Mg <sub>65</sub> Cu <sub>25</sub> Gd <sub>10</sub>                                                | 423  | 39  | [7] |
| 195 | Mg <sub>65</sub> Cu <sub>20</sub> Ni <sub>5</sub> Gd <sub>10</sub>                                | 423  | 39  | [7] |
| 196 | Pd <sub>40</sub> Cu <sub>30</sub> Ni <sub>10</sub> P <sub>20</sub>                                | 578  | 52  | [7] |
| 197 | Pd <sub>42.5</sub> Cu <sub>30</sub> Ni <sub>7.5</sub> P <sub>20</sub>                             | 566  | 58  | [7] |
| 198 | Pd <sub>42.5</sub> Cu <sub>30</sub> Ni <sub>7.5</sub> P <sub>20</sub>                             | 576  | 40  | [7] |
| 199 | Pd <sub>43</sub> Cu <sub>27</sub> Ni <sub>10</sub> P <sub>20</sub>                                | 576  | 58  | [7] |

|     |                                                                                                                    |     |     |      |
|-----|--------------------------------------------------------------------------------------------------------------------|-----|-----|------|
| 200 | Zr <sub>55</sub> Co <sub>25</sub> Al <sub>20</sub>                                                                 | 753 | 65  | [7]  |
| 201 | Pd <sub>77.5</sub> Cu <sub>6</sub> Si <sub>16.5</sub>                                                              | 637 | 73  | [7]  |
| 202 | Cu <sub>47</sub> Ti <sub>34</sub> Zr <sub>11</sub> Ni <sub>8</sub>                                                 | 673 | 59  | [5]  |
| 203 | La <sub>55</sub> Cu <sub>20</sub> Al <sub>25</sub>                                                                 | 456 | 42  | [5]  |
| 204 | La <sub>55</sub> Cu <sub>10</sub> Ni <sub>5</sub> Co <sub>5</sub> Al <sub>25</sub>                                 | 466 | 37  | [5]  |
| 205 | Zr <sub>65</sub> Al <sub>7.5</sub> Ni <sub>10</sub> Cu <sub>17.5</sub>                                             | 656 | 35  | [5]  |
| 206 | Pt <sub>57.5</sub> Ni <sub>5.3</sub> Cu <sub>14.7</sub> P <sub>22.5</sub>                                          | 490 | 68  | [8]  |
| 207 | Ce <sub>70</sub> Ni <sub>10</sub> Cu <sub>10</sub> Al <sub>10</sub>                                                | 359 | 21  | [8]  |
| 208 | Pr <sub>60</sub> Ni <sub>10</sub> Cu <sub>10</sub> Al <sub>10</sub>                                                | 409 | 31  | [8]  |
| 209 | Pr <sub>55</sub> Co <sub>20</sub> Al <sub>25</sub>                                                                 | 509 | 38  | [8]  |
| 210 | Tb <sub>55</sub> Co <sub>20</sub> Al <sub>25</sub>                                                                 | 612 | 32  | [8]  |
| 211 | Dy <sub>55</sub> Co <sub>20</sub> Al <sub>25</sub>                                                                 | 635 | 30  | [8]  |
| 212 | Ho <sub>55</sub> Co <sub>20</sub> Al <sub>25</sub>                                                                 | 649 | 25  | [8]  |
| 213 | Er <sub>55</sub> Co <sub>20</sub> Al <sub>25</sub>                                                                 | 663 | 28  | [8]  |
| 214 | Ca <sub>65</sub> Li <sub>9.96</sub> Mg <sub>8.54</sub> Zn <sub>16.5</sub>                                          | 317 | 20  | [8]  |
| 215 | Ni <sub>60</sub> Nb <sub>35</sub> Sn <sub>5</sub>                                                                  | 882 | 60  | [8]  |
| 216 | Mg <sub>65</sub> Cu <sub>25</sub> Tb <sub>10</sub>                                                                 | 428 | 47  | [9]  |
| 217 | Ni <sub>64</sub> Pd <sub>16</sub> P <sub>20</sub>                                                                  | 567 | 65  | [10] |
| 218 | Pd <sub>64</sub> Ni <sub>16</sub> P <sub>20</sub>                                                                  | 582 | 67  | [10] |
| 219 | Ni <sub>59.5</sub> Nb <sub>40.5</sub>                                                                              | 920 | 136 | [9]  |
| 220 | Ni <sub>69</sub> Cr <sub>8.5</sub> Nb <sub>3</sub> P <sub>19.5</sub>                                               | 660 | 100 | [10] |
| 221 | Ni <sub>69</sub> Cr <sub>8.5</sub> Nb <sub>3</sub> P <sub>18</sub> B <sub>1.5</sub>                                | 664 | 77  | [10] |
| 222 | Ni <sub>69</sub> Cr <sub>8.5</sub> Nb <sub>3</sub> P <sub>16.5</sub> B <sub>3</sub>                                | 668 | 59  | [10] |
| 223 | Ni <sub>69</sub> Cr <sub>8.5</sub> Nb <sub>3</sub> P <sub>13.5</sub> B <sub>6</sub>                                | 671 | 54  | [10] |
| 224 | Ni <sub>80</sub> P <sub>20</sub> ribbons                                                                           | 581 | 94  | [10] |
| 225 | Fe <sub>74.5</sub> Mo <sub>5.5</sub> P <sub>12.5</sub> C <sub>5</sub> B <sub>2.5</sub>                             | 695 | 63  | [10] |
| 226 | Fe <sub>68</sub> Mo <sub>5</sub> Ni <sub>5</sub> Cr <sub>2</sub> P <sub>12.5</sub> C <sub>5</sub> B <sub>2.5</sub> | 668 | 62  | [10] |
| 227 | Fe <sub>48</sub> Cr <sub>15</sub> Mo <sub>14</sub> C <sub>15</sub> B <sub>6</sub> Y <sub>2</sub>                   | 822 | 51  | [10] |
| 228 | Fe <sub>41</sub> Co <sub>7</sub> Cr <sub>15</sub> Mo <sub>14</sub> C <sub>15</sub> B <sub>6</sub> Y <sub>2</sub>   | 820 | 43  | [10] |
| 229 | Pd <sub>79.5</sub> Au <sub>4</sub> Si <sub>16.5</sub>                                                              | 620 | 77  | [10] |
| 230 | Pd <sub>40</sub> Ni <sub>40</sub> P <sub>19</sub> Si <sub>1</sub>                                                  | 567 | 48  | [10] |
| 231 | Zr <sub>50</sub> Cu <sub>50</sub>                                                                                  | 673 | 58  | [10] |
| 232 | Zr <sub>11</sub> Ti <sub>34</sub> Cu <sub>47</sub> Ni <sub>8</sub>                                                 | 671 | 67  | [10] |
| 233 | Zr <sub>57</sub> Nb <sub>5</sub> Cu <sub>15.4</sub> Ni <sub>12.6</sub> Al <sub>10</sub>                            | 674 | 48  | [10] |
| 234 | Zr <sub>58.5</sub> Nb <sub>2.8</sub> Cu <sub>15.6</sub> Ni <sub>12.8</sub> Al <sub>10.3</sub>                      | 666 | 48  | [10] |
| 235 | Mg <sub>59.4</sub> Cu <sub>23</sub> Ag <sub>6.6</sub> Gd <sub>11</sub>                                             | 425 | 44  | [10] |
| 236 | Zr <sub>55</sub> Co <sub>22.5</sub> Al <sub>22.5</sub>                                                             | 753 | 73  | [2]  |
| 237 | Pd <sub>40</sub> Ni <sub>40</sub> P <sub>20</sub>                                                                  | 560 | 51  | [2]  |
| 238 | Pt <sub>45</sub> Ni <sub>30</sub> P <sub>25</sub>                                                                  | 482 | 48  | [2]  |
| 239 | Pt <sub>60</sub> Ni <sub>15</sub> P <sub>20</sub>                                                                  | 482 | 50  | [2]  |
| 240 | Pr <sub>60</sub> Cu <sub>20</sub> Ni <sub>10</sub> Al <sub>10</sub>                                                | 409 | 31  | [2]  |

|     |                                                                                               |     |     |      |
|-----|-----------------------------------------------------------------------------------------------|-----|-----|------|
| 241 | $(\text{Fe}_5\text{Co}_{63}\text{B}_{12})_{80}\text{Si}_3\text{Al}_5\text{Ga}_2\text{P}_{10}$ | 745 | 63  | [2]  |
| 242 | $\text{Fe}_{80}\text{P}_{13}\text{C}_7$                                                       | 736 | 102 | [2]  |
| 243 | $\text{Ni}_{62.4}\text{Nb}_{37.6}$                                                            | 945 | 121 | [2]  |
| 244 | $\text{Ce}_{70}\text{Ni}_{10}\text{Cu}_{10}\text{Al}_{10}$                                    | 359 | 21  | [2]  |
| 245 | $\text{Pd}_{77}\text{Cu}_6\text{Si}_{17}$                                                     | 635 | 52  | [2]  |
| 246 | $\text{Pd}_{43}\text{Ni}_{10}\text{Cu}_{27}\text{P}_{20}$                                     | 569 | 65  | [2]  |
| 247 | $\text{Gd}_{55}\text{Al}_{25}\text{Cu}_{10}\text{Co}_5\text{Ni}_5$                            | 563 | 37  | [11] |
| 248 | $\text{Gd}_{55}\text{Al}_{25}\text{Co}_{19}\text{Cu}_{10}$                                    | 563 | 45  | [11] |
| 249 | $\text{Gd}_{55}\text{Al}_{25}\text{Ni}_{10}\text{Co}_{10}$                                    | 579 | 58  | [11] |
| 250 | $\text{Gd}_{55}\text{Al}_{25}\text{Co}_{20}$                                                  | 589 | 74  | [11] |
| 251 | $\text{Ca}_{65}\text{Mg}_{15}\text{Zn}_{20}$                                                  | 373 | 21  | [12] |
| 252 | $\text{Ce}_{70}\text{Ni}_{10}\text{Cu}_{10}\text{Al}_{20}$                                    | 358 | 29  | [12] |
| 253 | $\text{Hf}_{50}\text{Ni}_{25}\text{Al}_{25}$                                                  | 858 | 33  | [12] |
| 254 | $\text{Hf}_{55}\text{Ni}_{25}\text{Al}_{20}$                                                  | 828 | 36  | [12] |
| 255 | $\text{La}_{66}\text{Cu}_{10}\text{Ni}_{10}\text{Al}_{14}$                                    | 459 | 32  | [12] |
| 256 | $\text{Fe}_{63}\text{Mo}_{14}\text{C}_{15}\text{B}_6\text{Er}_2$                              | 778 | 28  | [12] |
| 257 | $\text{Fe}_{65}\text{Mo}_{14}\text{C}_{15}\text{B}_6$                                         | 790 | 33  | [12] |
| 258 | $\text{Pt}_{57.5}\text{Cu}_{14.7}\text{Ni}_{5.3}\text{P}_{22.5}$                              | 508 | 68  | [12] |
| 259 | $\text{Pd}_{77.5}\text{Cu}_6\text{Si}_{16.5}$                                                 | 673 | 52  | [12] |
| 260 | $\text{Mg}_{65}\text{Cu}_{7.5}\text{Ni}_{7.5}\text{Zn}_5\text{Ag}_5\text{Y}_5\text{Gd}_5$     | 431 | 40  | [12] |
| 261 | $\text{Mg}_{65}\text{Cu}_{25}\text{Gd}_{10}$                                                  | 423 | 39  | [12] |
| 262 | $\text{Mg}_{58.5}\text{Cu}_{30.5}\text{Y}_{11}$                                               | 412 | 30  | [12] |
| 263 | $\text{Mg}_{57}\text{Cu}_{31}\text{Y}_{6.6}\text{Nd}_{5.4}$                                   | 427 | 29  | [12] |
| 264 | $\text{Cu}_{47.5}\text{Zr}_{47.5}\text{Al}_4$                                                 | 683 | 44  | [12] |
| 265 | $\text{Cu}_{43}\text{Zr}_{43}\text{Al}_7\text{Ag}_7$                                          | 700 | 45  | [12] |
| 266 | $\text{Cu}_{43}\text{Zr}_{43}\text{Al}_7\text{Be}_7$                                          | 696 | 42  | [12] |
| 267 | $\text{Cu}_{46.25}\text{Zr}_{45.25}\text{Al}_{7.5}\text{Sn}_1$                                | 718 | 40  | [12] |
| 268 | $\text{Cu}_{50}\text{Zr}_{50}$                                                                | 664 | 39  | [12] |
| 269 | $\text{Zr}_{42}\text{Cu}_{46}\text{Al}_7\text{Y}_5$                                           | 713 | 49  | [12] |
| 270 | $\text{Zr}_{64}\text{Cu}_{26}\text{Al}_{10}$                                                  | 662 | 44  | [12] |
| 271 | $\text{Zr}_{50}\text{Cu}_{41.5}\text{Al}_{5.5}\text{Mo}_3$                                    | 688 | 50  | [12] |
| 272 | $\text{Zr}_{50}\text{Cu}_{43}\text{Al}_{5.5}\text{Mo}_{1.5}$                                  | 685 | 47  | [12] |
| 273 | $\text{Zr}_{50}\text{Cu}_{44}\text{Al}_{5.5}\text{Mo}_{0.5}$                                  | 682 | 41  | [12] |
| 274 | $\text{Zr}_{50}\text{Cu}_{44.5}\text{Al}_{5.5}$                                               | 678 | 39  | [12] |
| 275 | $\text{Zr}_{60}\text{Cu}_{48}\text{Al}_{12}$                                                  | 676 | 47  | [12] |
| 276 | $\text{Zr}_{62}\text{Cu}_{23}\text{Al}_7\text{Pb}_5\text{Nb}_3$                               | 670 | 56  | [12] |
| 277 | $\text{Zr}_{60}\text{Cu}_{25}\text{Al}_7\text{Pb}_5\text{Nb}_3$                               | 674 | 43  | [12] |
| 278 | $\text{Zr}_{55}\text{Cu}_{30}\text{Al}_7\text{Pb}_5\text{Nb}_3$                               | 693 | 41  | [12] |
| 279 | $\text{Zr}_{50}\text{Cu}_{35}\text{Al}_7\text{Pb}_5\text{Nb}_3$                               | 710 | 37  | [12] |
| 280 | $\text{Pr}_{55}\text{Ni}_{25}\text{Al}_{20}$                                                  | 484 | 19  | [13] |
| 281 | $\text{Sm}_{55}\text{Co}_{10}\text{Cu}_{10}\text{Al}_{25}$                                    | 534 | 27  | [13] |



|     |                                                                      |     |    |      |
|-----|----------------------------------------------------------------------|-----|----|------|
| 282 | $\text{Sm}_{50}\text{Co}_{20}\text{Al}_{30}$                         | 586 | 29 | [13] |
| 283 | $\text{Ce}_{55}\text{Al}_{45}$                                       | 541 | 32 | [13] |
| 284 | $\text{Sm}_{55}\text{Ni}_{10}\text{Co}_{10}\text{Al}_{25}$           | 553 | 37 | [13] |
| 285 | $\text{Pd}_{36.5}\text{Ni}_{36.5}\text{P}_{27}$                      | 635 | 62 | [14] |
| 286 | $\text{Pd}_{37.5}\text{Ni}_{37.5}\text{P}_{25}$                      | 619 | 51 | [14] |
| 287 | $\text{Fe}_{30.8}\text{Co}_{46.2}\text{P}_{14}\text{B}_6\text{Al}_3$ | 724 | 43 | [14] |
| 288 | $\text{Pt}_{64}\text{Ni}_{16}\text{P}_{20}$                          | 482 | 50 | [14] |
| 289 | $\text{Pt}_{56}\text{Ni}_{14}\text{P}_{30}$                          | 498 | 56 | [14] |
| 290 | $\text{Au}_{76.9}\text{Ge}_{13.65}\text{Si}_{19.45}$                 | 295 | 60 | [14] |
| 291 | $\text{Ni}_{75}\text{P}_{16}\text{B}_6\text{Al}_3$                   | 691 | 53 | [10] |
| 292 | $\text{Zr}_{60}\text{Cu}_{40}\text{Al}_{10}$                         | 706 | 57 | [10] |
| 293 | $\text{Mg}_{61}\text{Cu}_{28}\text{Gd}_{11}$                         | 418 | 38 | [10] |

## References for Supplementary Material

- [1] A. Jaiswal, T. Egami, K. F. Kelton, K. S. Schweizer, and Y. Zhang, Correlation between Fragility and the Arrhenius Crossover Phenomenon in Metallic, Molecular, and Network Liquids, *Phys. Rev. Lett.* **117**, 205701 (2016).
- [2] Q. Qin and G. B. McKenna, Correlation between dynamic fragility and glass transition temperature for different classes of glass forming liquids, *J. Non-Cryst. Solids* **352**, 2977 (2006).
- [3] V. N. Novikov, Y. Ding, and A. P. Sokolov, Correlation of fragility of supercooled liquids with elastic properties of glasses, *Phys. Rev. E* **71**, 061501 (2005).
- [4] L. M. Wang, C. A. Angell, and R. Richert, Fragility and thermodynamics in nonpolymeric glass-forming liquids, *J. Chem. Phys.* **125**, 074505 (2006).
- [5] O. N. Senkov, Correlation between fragility and glass-forming ability of metallic alloys, *Phys. Rev. B* **76** (2007).
- [6] L. Hornbøll and Y. Yue, Enthalpy relaxation in hyperquenched glasses of different fragility, *J. Non-Cryst. Solids* **354**, 1862 (2008).
- [7] X.-J. Xu, Z.-L. Long, W. Liu, and G.-K. Liao, Effects of fragility and reduced glass

transition temperature on the glass formation ability of amorphous alloys, *Mater. Res. Exp.* **4**, 115201 (2017).

[8] W. H. Wang, The elastic properties, elastic models and elastic perspectives of metallic glasses, *Prog. Mater. Sci.* **57**, 487 (2012).

[9] V. N. Novikov and A. P. Sokolov, Correlation of fragility and Poisson's ratio: Difference between metallic and nonmetallic glass formers, *Phys. Rev. B* **74** (2006).

[10] W. L. Johnson, J. H. Na, and M. D. Demetriou, Quantifying the origin of metallic glass formation, *Nat. Commun.* **7**, 10313 (2016).

[11] J. Guo, X. Bian, Y. Zhao, S. Zhang, T. Li, and C. Wang, Correlation between the fragility of supercooled liquids and thermal expansion in the glassy state for Gd-based glass-forming alloys, *J. Phys.: Condens. Matter* **19**, 116103 (2007).

[12] T. Wang, L. Hu, Y. Liu, and X. Hui, Intrinsic correlation of the plasticity with liquid behavior of bulk metallic glass forming alloys, *Mater. Sci. Eng. A* **744**, 316 (2019).

[13] Q. Sun, C. Zhou, Y. Yue, and L. Hu, A Direct Link between the Fragile-to-Strong Transition and Relaxation in Supercooled Liquids, *J. Phys. Chem. Lett.* **5**, 1170 (2014).

[14] L. Hu, X. Bian, W. Wang, G. Liu, and Y. Jia, Thermodynamics and dynamics of metallic glass formers: their correlation for the investigation on potential energy landscape, *J. Phys. Chem. B* **109**, 13737 (2005).
